# Supplementary material for: Variation of Main Phenophases in Phenological Calendar in East China and Their Response to Climate Change
Source: Hindawi journal article supplement (doi:10.1155/2016/9546380), 2016-01-01
Supplement: f1 [file 9546380.f1.docx]

# Appendix

The appendix tables are phenological calendars of 3 phenological observation stations (Shanghai, Nanjing, and Hefei) in East China. The phenological calendars were compiled according to the sequences of mean phenophases, and phenophases with observation of less than 3 years were not listed. The abbreviation of phenophases in the third column from the left are listed in section 2.2 in the article. The unit of mean phenophase is day of the year (DOY).

APPENDIX TABLE 1: Phenological calendar of Shanghai (1987-1996 and 2003-2012)

| No. | Species | Phenophase | Number of years of observation (1987-1996) | Mean phenophase (1987-1996) | Number of years of observation (2003-2012) | Mean phenophase (2003-2012) | Difference between 2003-2012 and 1987-1996 |
| --- | --- | --- | --- | --- | --- | --- | --- |
| 1 | *Jasminum nudiflorum* | FF | 10 | 42 | 8 | 39 | -3.7 |
| 2 | *Jasminum nudiflorum* | 50F | 8 | 55 | 9 | 51 | -4.9 |
| 3 | *Edgeworthia chrysantha.* | 50F | 9 | 63 | 3 | 64 | 1.2 |
| 4 | *Magnolia denudata* | FF | 10 | 73 | 6 | 69 | -3.5 |
| 5 | *Metasequoia glyptostroboides* | BB | 8 | 79 | 6 | 71 | -8.4 |
| 6 | *Hibiscus syriacus* | BB | 5 | 90 | 5 | 71 | -18.6 |
| 7 | *Punica granatum* | BB | 8 | 85 | 8 | 73 | -12.4 |
| 8 | *Cercis chinensis* | FL | 9 | 94 | 7 | 74 | -19.6 |
| 9 | *Salix matsudana* | FF | 8 | 80 | 10 | 75 | -4.3 |
| 10 | *Magnolia denudata* | 50F | 10 | 76 | 10 | 75 | -0.9 |
| 11 | *Syringa oblata* | FF | 9 | 96 | 7 | 81 | -15.1 |
| 12 | *Magnolia denudata* | FL | 9 | 93 | 5 | 85 | -8.0 |
| 13 | *Punica granatum* | FL | 9 | 103 | 8 | 85 | -18.1 |
| 14 | *Metasequoia glyptostroboides* | FL | 9 | 99 | 6 | 88 | -11.7 |
| 15 | *Jasminum nudiflorum* | EF | 10 | 92 | 5 | 89 | -3.2 |
| 16 | *Platanus acerifolia* | FL | 10 | 98 | 7 | 90 | -7.7 |
| 17 | *Edgeworthia chrysantha.* | EF | 10 | 97 | 3 | 99 | 1.8 |
| 18 | *Malus halliana* | EF | 7 | 112 | 5 | 113 | 0.3 |
| 19 | *Robinia pseudoacacia* | FF | 9 | 121 | 10 | 116 | -5.3 |
| 20 | *Punica granatum* | FF | 10 | 143 | 6 | 129 | -14.1 |
| 21 | *Ligustrum lucidum* | 50F | 8 | 175 | 7 | 170 | -5.0 |
| 22 | *Magnolia denudata* | BLC | 5 | 274 | 10 | 290 | 16.0 |
| 23 | *Punica granatum* | BLC | 3 | 298 | 9 | 295 | -3.3 |
| 24 | *Hibiscus syriacus* | BLC | 3 | 298 | 7 | 299 | 0.8 |
| 25 | *Platanus acerifolia* | BLF | 4 | 297 | 9 | 299 | 2.1 |
| 26 | *Chimonanthus praecox* | BLC | 8 | 309 | 3 | 317 | 7.9 |
| 27 | *Platanus acerifolia* | ELC | 9 | 330 | 9 | 333 | 2.8 |
| 28 | *Magnolia denudata* | ELC | 6 | 326 | 7 | 340 | 13.9 |
| 29 | *Punica granatum* | ELF | 9 | 334 | 8 | 352 | 18.0 |
| 30 | *Magnolia denudata* | ELF | 10 | 338 | 10 | 352 | 14.6 |
| 31 | *Cercis chinensis* | ELF | 7 | 330 | 9 | 355 | 25.2 |
| 32 | *Hibiscus syriacus* | ELF | 6 | 338 | 3 | 358 | 20.0 |
| 33 | *Edgeworthia chrysantha.* | ELC | 8 | 343 | 3 | 364 | 21.0 |
| 34 | *Malus halliana* | ELF | 5 | 347 | 3 | 365 | 18.3 |
| 35 | *Metasequoia glyptostroboides* | ELF | 8 | 358 | 9 | 375* | 17.6 |

Unit of mean phenophase: day of the year, DOY.

* means it appeared in Jan 10th of the next year.

APPENDIX TABLE 2: Phenological calendar of Nanjing (1987-1996 and 2003-2012)

| No. | Species | Phenophase | Number of years of observation (1987-1996) | Mean phenophase (1987-1996) | Number of years of observation (2003-2012) | Mean phenophase (2003-2012) | Difference between 2003-2012 and 1987-1996 |
| --- | --- | --- | --- | --- | --- | --- | --- |
| 1 | *Salix babylonica* | BE | 8 | 38 | 5 | 39 | 1.0 |
| 2 | *Ilex chinensis* | BE | 8 | 45 | 3 | 42 | -3.0 |
| 3 | *Jasminum nudiflorum* | FF | 9 | 47 | 8 | 43 | -3.5 |
| 4 | *Platycladus orientalis* | FF | 7 | 46 | 3 | 46 | 0.0 |
| 5 | *Photinia serrulata* | FL | 9 | 59 | 5 | 47 | -11.9 |
| 6 | *Armeniaca mume* | FF | 9 | 40 | 5 | 47 | 7.2 |
| 7 | *Spiraea prunifolia* | FL | 9 | 53 | 3 | 50 | -3.0 |
| 8 | *Ginkgo biloba* | BE | 9 | 54 | 8 | 50 | -3.0 |
| 9 | *Platanus acerifolia* | BE | 9 | 60 | 3 | 51 | -9.0 |
| 10 | *Acer buergerianum* | BE | 8 | 57 | 3 | 51 | -6.0 |
| 11 | *Amygdalus persica* | BE | 6 | 51 | 6 | 51 | 0.0 |
| 12 | *Jasminum nudiflorum* | BE | 5 | 54 | 3 | 52 | -2.0 |
| 13 | *Sabina chinensis* | FF | 7 | 53 | 3 | 52 | -1.0 |
| 14 | *Salix babylonica* | FL | 9 | 53 | 6 | 52 | -1.9 |
| 15 | *Jasminum nudiflorum* | 50F | 9 | 56 | 8 | 52 | -4.6 |
| 16 | *Ilex chinensis* | BB | 8 | 55 | 3 | 53 | -2.0 |
| 17 | *Acer buergerianum* | BB | 8 | 66 | 3 | 53 | -13.0 |
| 18 | *Salix babylonica* | BB | 9 | 46 | 5 | 55 | 9.0 |
| 19 | *Armeniaca mume* | 50F | 9 | 52 | 5 | 56 | 3.3 |
| 20 | *Armeniaca mume* | BE | 3 | 58 | 3 | 58 | 0.0 |
| 21 | *Quercus acutissima* | BE | 8 | 59 | 4 | 59 | 0.0 |
| 22 | *Platycladus orientalis* | 50F | 8 | 59 | 3 | 59 | 0.0 |
| 23 | *Spiraea prunifolia* | 50L | 9 | 63 | 3 | 59 | -4.0 |
| 24 | *Salix babylonica* | 50L | 9 | 64 | 6 | 59 | -5.1 |
| 25 | *Metasequoia glyptostroboides* | BE | 9 | 63 | 8 | 60 | -3.0 |
| 26 | *Amygdalus persica* | BB | 7 | 63 | 6 | 61 | -2.0 |
| 27 | *Platanus acerifolia* | BB | 9 | 74 | 3 | 62 | -12.0 |
| 28 | *Ilex chinensis* | FL | 8 | 64 | 3 | 63 | -1.0 |
| 29 | *Magnolia denudata* | FF | 8 | 66 | 8 | 64 | -1.8 |
| 30 | *Salix babylonica* | FF | 9 | 65 | 6 | 64 | -0.9 |
| 31 | *Photinia serrulata* | 50L | 9 | 67 | 5 | 64 | -2.8 |
| 32 | *Ulmus pumila* | BE | 6 | 61 | 3 | 65 | 4.0 |
| 33 | *Sabina chinensis* | 50F | 8 | 65 | 3 | 65 | 0.0 |
| 34 | *Armeniaca mume* | BB | 3 | 66 | 3 | 65 | -1.0 |
| 35 | *Broussonetia papyrifera* | BE | 8 | 75 | 6 | 66 | -9.0 |
| 36 | *Ginkgo biloba* | BB | 9 | 82 | 8 | 67 | -15.0 |
| 37 | *Celtis sinensis* | BE | 6 | 74 | 3 | 68 | -6.0 |
| 38 | *Quercus acutissima* | BB | 9 | 70 | 4 | 68 | -2.0 |
| 39 | *Camellia japonica* | FF | 9 | 72 | 3 | 69 | -3.0 |
| 40 | *Ulmus pumila* | BB | 6 | 73 | 3 | 69 | -4.0 |
| 41 | *Spiraea prunifolia* | FF | 9 | 75 | 3 | 69 | -6.0 |
| 42 | *Toona sinensis* | BE | 8 | 68 | 5 | 70 | 2.0 |
| 43 | *Ilex chinensis* | 50L | 8 | 71 | 3 | 70 | -1.0 |
| 44 | *Magnolia denudata* | 50F | 8 | 72 | 8 | 70 | -2.0 |
| 45 | *Cinnamomum camphora* | BE | 4 | 67 | 6 | 71 | 4.0 |
| 46 | *Jasminum nudiflorum* | FL | 8 | 73 | 5 | 71 | -1.5 |
| 47 | *Metasequoia glyptostroboides* | BB | 9 | 74 | 8 | 72 | -2.0 |
| 48 | *Celtis sinensis* | BB | 7 | 85 | 3 | 73 | -12.0 |
| 49 | *Platycladus orientalis* | EF | 8 | 88 | 3 | 73 | -15.0 |
| 50 | *Salix babylonica* | 50F | 9 | 72 | 6 | 73 | 0.2 |
| 51 | *Pterocarya stenoptera* | FL | 9 | 72 | 7 | 73 | 0.6 |
| 52 | *Armeniaca mume* | FL | 9 | 71 | 5 | 74 | 3.1 |
| 53 | *Cinnamomum camphora* | BB | 3 | 71 | 7 | 75 | 4.0 |
| 54 | *Lagerstroemia indica* | BE | 7 | 81 | 3 | 75 | -6.0 |
| 55 | *Punica granatum* | BE | 8 | 86 | 5 | 75 | -11.0 |
| 56 | *Camellia japonica* | 50F | 9 | 79 | 3 | 76 | -3.0 |
| 57 | *Spiraea prunifolia* | 50F | 9 | 82 | 3 | 76 | -6.0 |
| 58 | *Hibiscus syriacus* | BE | 9 | 79 | 7 | 76 | -3.0 |
| 59 | *Chimonanthus praecox* | FL | 8 | 79 | 7 | 76 | -3.5 |
| 60 | *Broussonetia papyrifera* | BB | 7 | 81 | 6 | 76 | -5.0 |
| 61 | *Buxus sinica* | FL | 9 | 65 | 5 | 77 | 12.0 |
| 62 | *Robinia pseudoacacia* | BE | 9 | 80 | 8 | 77 | -3.0 |
| 63 | *Quercus acutissima* | FL | 9 | 88 | 5 | 77 | -11.5 |
| 64 | *Pterocarya stenoptera* | FF | 9 | 78 | 7 | 77 | -0.7 |
| 65 | *Toona sinensis* | BB | 8 | 76 | 5 | 78 | 2.0 |
| 66 | *Nandina domestica* | FL | 5 | 81 | 5 | 78 | -3.2 |
| 67 | *Acer buergerianum* | FL | 9 | 83 | 5 | 78 | -5.6 |
| 68 | *Osmanthus fragrans* | FL | 5 | 83 | 5 | 79 | -4.4 |
| 69 | *Jasminum nudiflorum* | 50L | 8 | 80 | 5 | 79 | -1.2 |
| 70 | *Pterocarya stenoptera* | 50L | 9 | 80 | 7 | 80 | -0.7 |
| 71 | *Armeniaca mume* | EF | 9 | 75 | 5 | 80 | 4.8 |
| 72 | *Magnolia denudata* | FL | 9 | 88 | 8 | 80 | -8.0 |
| 73 | *Ginkgo biloba* | FL | 9 | 94 | 8 | 80 | -13.4 |
| 74 | *Armeniaca mume* | 50L | 8 | 76 | 5 | 81 | 5.2 |
| 75 | *Robinia pseudoacacia* | BB | 9 | 89 | 8 | 82 | -7.0 |
| 76 | *Lagerstroemia indica* | BB | 7 | 92 | 4 | 82 | -10.0 |
| 77 | *Cinnamomum camphora* | FL | 4 | 93 | 8 | 82 | -10.5 |
| 78 | *Sabina chinensis* | EF | 8 | 101 | 3 | 83 | -18.0 |
| 79 | *Punica granatum* | BB | 8 | 92 | 5 | 83 | -9.0 |
| 80 | *Pterocarya stenoptera* | 50F | 9 | 86 | 7 | 83 | -3.0 |
| 81 | *Chimonanthus praecox* | 50L | 8 | 91 | 7 | 83 | -8.3 |
| 82 | *Magnolia denudata* | EF | 8 | 92 | 8 | 83 | -9.1 |
| 83 | *Salix babylonica* | EF | 9 | 93 | 6 | 83 | -9.6 |
| 84 | *Toona sinensis* | FL | 8 | 89 | 5 | 84 | -5.2 |
| 85 | *Amygdalus persica* | FF | 9 | 87 | 8 | 84 | -3.0 |
| 86 | *Buxus sinica* | 50L | 9 | 70 | 5 | 85 | 15.0 |
| 87 | *Hibiscus syriacus* | BB | 9 | 82 | 7 | 85 | 3.0 |
| 88 | *Metasequoia glyptostroboides* | FL | 9 | 90 | 8 | 85 | -5.0 |
| 89 | *Acer buergerianum* | 50L | 9 | 91 | 5 | 85 | -6.0 |
| 90 | *Quercus acutissima* | 50L | 9 | 96 | 5 | 86 | -10.0 |
| 91 | *Amygdalus persica* | FL | 8 | 86 | 8 | 87 | 1.0 |
| 92 | *Pistacia chinensis* | FF | 7 | 123 | 3 | 87 | -36.0 |
| 93 | *Ligustrum lucidum* | FL | 4 | 97 | 7 | 88 | -9.5 |
| 94 | *Nandina domestica* | 50L | 6 | 94 | 5 | 88 | -5.9 |
| 95 | *Ulmus pumila* | FL | 8 | 87 | 5 | 88 | 1.1 |
| 96 | *Robinia pseudoacacia* | FL | 9 | 96 | 8 | 88 | -7.6 |
| 97 | *Albizia julibrissin* | BE | 6 | 83 | 5 | 89 | 6.0 |
| 98 | *Pistacia chinensis* | FL | 7 | 86 | 3 | 89 | 3.0 |
| 99 | *Sabina chinensis* | FL | 3 | 101 | 6 | 89 | -11.8 |
| 100 | *Broussonetia papyrifera* | FL | 9 | 93 | 8 | 90 | -3.0 |
| 101 | *Amygdalus persica* | 50F | 9 | 92 | 8 | 90 | -2.1 |
| 102 | *Cinnamomum camphora* | 50L | 4 | 101 | 8 | 90 | -11.1 |
| 103 | *Osmanthus fragrans* | 50L | 5 | 95 | 5 | 90 | -5.2 |
| 104 | *Celtis sinensis* | FL | 8 | 96 | 5 | 90 | -6.3 |
| 105 | *Magnolia denudata* | 50L | 9 | 96 | 8 | 91 | -4.8 |
| 106 | *Vitex negundo* | FL | 8 | 98 | 3 | 92 | -6.0 |
| 107 | *Spiraea prunifolia* | EF | 9 | 104 | 3 | 92 | -12.0 |
| 108 | *Hibiscus syriacus* | FL | 9 | 99 | 8 | 92 | -7.4 |
| 109 | *Punica granatum* | FL | 8 | 100 | 5 | 92 | -7.6 |
| 110 | *Toona sinensis* | 50L | 8 | 95 | 5 | 93 | -1.9 |
| 111 | *Metasequoia glyptostroboides* | 50L | 9 | 98 | 8 | 93 | -4.8 |
| 112 | *Jasminum nudiflorum* | EF | 9 | 97 | 8 | 93 | -3.7 |
| 113 | *Quercus acutissima* | FF | 8 | 91 | 3 | 94 | 3.0 |
| 114 | *Platanus acerifolia* | FF | 9 | 95 | 3 | 95 | 0.0 |
| 115 | *Ginkgo biloba* | 50L | 9 | 101 | 8 | 95 | -6.7 |
| 116 | *Rhododendron simsii* | FF | 7 | 103 | 5 | 95 | -8.6 |
| 117 | *Pistacia chinensis* | 50F | 7 | 129 | 3 | 96 | -33.0 |
| 118 | *Amygdalus persica* | 50L | 8 | 94 | 8 | 96 | 1.8 |
| 119 | *Platanus acerifolia* | FL | 9 | 95 | 3 | 97 | 2.0 |
| 120 | *Sabina chinensis* | 50L | 3 | 110 | 6 | 97 | -13.3 |
| 121 | *Sophora japonica* | FL | 8 | 97 | 6 | 97 | -0.1 |
| 122 | *Pistacia chinensis* | 50L | 7 | 93 | 3 | 98 | 5.0 |
| 123 | *Platycladus orientalis* | FL | 3 | 103 | 3 | 98 | -5.0 |
| 124 | *Paulownia Sieb* | FF | 9 | 97 | 5 | 98 | 0.4 |
| 125 | *Broussonetia papyrifera* | FF | 9 | 98 | 8 | 98 | 0.0 |
| 126 | *Photinia serrulata* | FF | 7 | 100 | 5 | 98 | -2.7 |
| 127 | *Photinia serrulata* | 50F | 8 | 107 | 5 | 98 | -9.6 |
| 128 | *Ulmus pumila* | 50L | 8 | 97 | 5 | 98 | 1.3 |
| 129 | *Ligustrum lucidum* | 50L | 3 | 105 | 7 | 98 | -7.2 |
| 130 | *Robinia pseudoacacia* | 50L | 9 | 104 | 8 | 98 | -5.5 |
| 131 | *Quercus acutissima* | 50F | 8 | 98 | 3 | 99 | 1.0 |
| 132 | *Punica granatum* | 50L | 8 | 106 | 5 | 99 | -7.3 |
| 133 | *Celtis sinensis* | 50L | 8 | 103 | 5 | 99 | -4.0 |
| 134 | *Platanus acerifolia* | 50F | 9 | 101 | 3 | 100 | -1.0 |
| 135 | *Vitex negundo* | 50L | 8 | 105 | 3 | 100 | -5.0 |
| 136 | *Ginkgo biloba* | FF | 8 | 106 | 3 | 100 | -6.0 |
| 137 | *Broussonetia papyrifera* | 50L | 9 | 104 | 8 | 100 | -4.0 |
| 138 | *Hibiscus syriacus* | 50L | 9 | 108 | 8 | 100 | -7.7 |
| 139 | *Rhododendron simsii* | 50F | 7 | 109 | 5 | 100 | -8.9 |
| 140 | *Albizia julibrissin* | FL | 8 | 104 | 5 | 101 | -3.2 |
| 141 | *Lagerstroemia indica* | FL | 9 | 100 | 8 | 102 | 1.9 |
| 142 | *Paulownia Sieb* | FL | 9 | 105 | 5 | 102 | -2.9 |
| 143 | *Albizia julibrissin* | BB | 6 | 92 | 5 | 103 | 11.0 |
| 144 | *Platanus acerifolia* | 50L | 9 | 103 | 3 | 103 | 0.0 |
| 145 | *Melia azedarach* | FL | 9 | 106 | 4 | 103 | -2.3 |
| 146 | *Sophora japonica* | 50L | 8 | 105 | 6 | 103 | -1.8 |
| 147 | *Platycladus orientalis* | 50L | 3 | 114 | 3 | 105 | -9.0 |
| 148 | *Pistacia chinensis* | EF | 7 | 142 | 3 | 105 | -37.0 |
| 149 | *Broussonetia papyrifera* | 50F | 9 | 104 | 8 | 105 | 1.0 |
| 150 | *Paulownia Sieb* | 50F | 9 | 103 | 5 | 105 | 2.1 |
| 151 | *Amygdalus persica* | EF | 9 | 109 | 8 | 105 | -4.0 |
| 152 | *Firmiana platanifolia* | FL | 9 | 109 | 5 | 107 | -2.6 |
| 153 | *Sapium sebiferum* | FL | 9 | 106 | 5 | 107 | 1.2 |
| 154 | *Ginkgo biloba* | 50F | 8 | 110 | 3 | 108 | -2.0 |
| 155 | *Pterocarya stenoptera* | EF | 9 | 112 | 7 | 108 | -4.8 |
| 156 | *Albizia julibrissin* | 50L | 8 | 111 | 5 | 110 | -1.6 |
| 157 | *Photinia serrulata* | EF | 8 | 116 | 5 | 110 | -5.8 |
| 158 | *Quercus acutissima* | EF | 8 | 107 | 3 | 111 | 4.0 |
| 159 | *Melia azedarach* | 50L | 9 | 112 | 4 | 111 | -0.9 |
| 160 | *Lagerstroemia indica* | 50L | 9 | 106 | 8 | 111 | 4.7 |
| 161 | *Paulownia Sieb* | 50L | 9 | 112 | 5 | 112 | -0.1 |
| 162 | *Acer buergerianum* | FF | 8 | 101 | 5 | 113 | 11.5 |
| 163 | *Paulownia Sieb* | EF | 9 | 126 | 5 | 113 | -13.1 |
| 164 | *Broussonetia papyrifera* | EF | 9 | 121 | 8 | 114 | -7.0 |
| 165 | *Robinia pseudoacacia* | FF | 9 | 115 | 8 | 114 | -1.7 |
| 166 | *Firmiana platanifolia* | 50L | 9 | 115 | 5 | 114 | -0.4 |
| 167 | *Sapium sebiferum* | 50L | 9 | 112 | 5 | 116 | 3.9 |
| 168 | *Ginkgo biloba* | EF | 8 | 117 | 3 | 117 | 0.0 |
| 169 | *Cinnamomum camphora* | FF | 9 | 121 | 8 | 118 | -3.4 |
| 170 | *Camellia japonica* | EF | 9 | 110 | 3 | 119 | 9.0 |
| 171 | *Robinia pseudoacacia* | 50F | 9 | 119 | 8 | 119 | 0.2 |
| 172 | *Acer buergerianum* | 50F | 8 | 107 | 5 | 119 | 12.2 |
| 173 | *Cinnamomum camphora* | 50F | 9 | 129 | 8 | 124 | -5.1 |
| 174 | *Melia azedarach* | FF | 9 | 127 | 5 | 124 | -2.9 |
| 175 | *Ilex chinensis* | FF | 8 | 107 | 3 | 125 | 18.0 |
| 176 | *Rhododendron simsii* | EF | 7 | 129 | 4 | 125 | -4.1 |
| 177 | *Robinia pseudoacacia* | EF | 9 | 130 | 8 | 127 | -2.3 |
| 178 | *Acer buergerianum* | EF | 8 | 120 | 5 | 129 | 9.3 |
| 179 | *Melia azedarach* | 50F | 9 | 133 | 5 | 130 | -3.3 |
| 180 | *Punica granatum* | FF | 9 | 138 | 9 | 130 | -7.9 |
| 181 | *Ilex chinensis* | 50F | 7 | 111 | 3 | 133 | 22.0 |
| 182 | *Platanus acerifolia* | EF | 8 | 133 | 3 | 133 | 0.0 |
| 183 | *Nerium indicum* | FF | 6 | 150 | 6 | 136 | -14.2 |
| 184 | *Punica granatum* | 50F | 9 | 146 | 9 | 137 | -9.0 |
| 185 | *Cinnamomum camphora* | EF | 9 | 147 | 8 | 138 | -8.7 |
| 186 | *Magnolia Grandiflora* | FF | 9 | 142 | 4 | 139 | -3.5 |
| 187 | *Gardenia stenophylla* | FF | 8 | 154 | 6 | 139 | -15.3 |
| 188 | *Nandina domestica* | FF | 9 | 131 | 5 | 140 | 9.0 |
| 189 | *Melia azedarach* | EF | 9 | 146 | 5 | 142 | -4.3 |
| 190 | *Magnolia Grandiflora* | 50F | 9 | 151 | 4 | 146 | -5.3 |
| 191 | *Nerium indicum* | 50F | 6 | 156 | 6 | 147 | -9.2 |
| 192 | *Gardenia stenophylla* | 50F | 8 | 162 | 6 | 148 | -14.0 |
| 193 | *Nandina domestica* | 50F | 9 | 139 | 5 | 148 | 9.0 |
| 194 | *Vitex negundo* | FF | 9 | 149 | 4 | 148 | -0.3 |
| 195 | *Gardenia jasminoides* | FF | 8 | 162 | 9 | 151 | -11.5 |
| 196 | *Vitex negundo* | 50F | 9 | 155 | 4 | 154 | -0.6 |
| 197 | *Firmiana platanifolia* | FF | 9 | 173 | 6 | 156 | -17.2 |
| 198 | *Albizia julibrissin* | FF | 9 | 155 | 9 | 156 | 0.8 |
| 199 | *Ilex chinensis* | EF | 7 | 153 | 3 | 157 | 4.0 |
| 200 | *Gardenia jasminoides* | 50F | 8 | 167 | 9 | 159 | -8.1 |
| 201 | *Ligustrum lucidum* | FF | 9 | 163 | 8 | 160 | -2.3 |
| 202 | *Albizia julibrissin* | 50F | 9 | 162 | 9 | 161 | -0.7 |
| 203 | *Firmiana platanifolia* | 50F | 9 | 180 | 6 | 163 | -17.1 |
| 204 | *Sapium sebiferum* | FF | 9 | 165 | 6 | 165 | -0.4 |
| 205 | *Ligustrum lucidum* | 50F | 9 | 167 | 8 | 166 | -1.5 |
| 206 | *Nandina domestica* | EF | 9 | 168 | 5 | 167 | -1.3 |
| 207 | *Punica granatum* | EF | 9 | 192 | 9 | 171 | -21.3 |
| 208 | *Gardenia stenophylla* | EF | 8 | 183 | 6 | 171 | -11.6 |
| 209 | *Hibiscus syriacus* | FF | 9 | 170 | 9 | 173 | 2.7 |
| 210 | *Sapium sebiferum* | 50F | 9 | 172 | 6 | 173 | 0.5 |
| 211 | *Magnolia Grandiflora* | EF | 9 | 181 | 4 | 173 | -7.8 |
| 212 | *Firmiana platanifolia* | EF | 9 | 196 | 6 | 179 | -17.8 |
| 213 | *Hibiscus syriacus* | 50F | 9 | 177 | 9 | 180 | 3.3 |
| 214 | *Lagerstroemia indica* | FF | 9 | 175 | 9 | 181 | 5.9 |
| 215 | *Sophora japonica* | FF | 9 | 188 | 7 | 182 | -6.2 |
| 216 | *Vitex negundo* | EF | 9 | 199 | 4 | 182 | -16.8 |
| 217 | *Gardenia jasminoides* | EF | 8 | 193 | 9 | 184 | -8.5 |
| 218 | *Ligustrum lucidum* | EF | 9 | 184 | 8 | 186 | 2.0 |
| 219 | *Sophora japonica* | 50F | 9 | 197 | 7 | 190 | -7.0 |
| 220 | *Sapium sebiferum* | EF | 9 | 189 | 6 | 191 | 1.8 |
| 221 | *Lagerstroemia indica* | 50F | 9 | 184 | 9 | 191 | 7.1 |
| 222 | *Sophora japonica* | EF | 9 | 232 | 7 | 216 | -15.8 |
| 223 | *Albizia julibrissin* | EF | 9 | 201 | 9 | 223 | 21.7 |
| 224 | *Osmanthus fragrans* | FF | 9 | 263 | 6 | 259 | -3.5 |
| 225 | *Lagerstroemia indica* | EF | 9 | 270 | 9 | 261 | -9.0 |
| 226 | *Osmanthus fragrans* | 50F | 9 | 271 | 6 | 267 | -4.3 |
| 227 | *Spiraea prunifolia* | BLC | 8 | 282 | 4 | 272 | -10.0 |
| 228 | *Spiraea prunifolia* | BLF | 9 | 289 | 4 | 277 | -12.0 |
| 229 | *Armeniaca mume* | BLC | 9 | 278 | 6 | 278 | -0.3 |
| 230 | *Vitex negundo* | BLF | 9 | 298 | 4 | 280 | -18.2 |
| 231 | *Prunus subhirtella* | BLC | 8 | 292 | 3 | 281 | -11.0 |
| 232 | *Osmanthus fragrans* | EF | 9 | 287 | 6 | 281 | -6.2 |
| 233 | *Hibiscus syriacus* | EF | 9 | 280 | 9 | 282 | 1.3 |
| 234 | *Armeniaca mume* | BLF | 9 | 294 | 6 | 287 | -6.8 |
| 235 | *Prunus subhirtella* | BLF | 9 | 307 | 3 | 288 | -19.0 |
| 236 | *Spiraea prunifolia* | ELC | 7 | 305 | 4 | 289 | -16.0 |
| 237 | *Magnolia denudata* | BLC | 9 | 287 | 9 | 293 | 5.4 |
| 238 | *Melia azedarach* | BLC | 8 | 285 | 5 | 293 | 7.9 |
| 239 | *Vitex negundo* | BLC | 9 | 285 | 4 | 295 | 10.4 |
| 240 | *Sapium sebiferum* | BLC | 9 | 283 | 6 | 296 | 12.4 |
| 241 | *Vitex negundo* | ELC | 9 | 298 | 4 | 297 | -1.1 |
| 242 | *Armeniaca mume* | ELC | 8 | 308 | 6 | 299 | -9.0 |
| 243 | *Amygdalus persica* | BLC | 7 | 289 | 9 | 299 | 9.5 |
| 244 | *Pistacia chinensis* | BLC | 8 | 298 | 4 | 299 | 1.3 |
| 245 | *Paulownia Sieb* | BLC | 9 | 310 | 6 | 300 | -9.9 |
| 246 | *Acer buergerianum* | BLC | 9 | 295 | 6 | 301 | 6.5 |
| 247 | *Lagerstroemia indica* | BLC | 8 | 293 | 9 | 301 | 8.3 |
| 248 | *Firmiana platanifolia* | BLC | 9 | 303 | 6 | 302 | -1.6 |
| 249 | *Melia azedarach* | BLF | 9 | 301 | 5 | 303 | 2.7 |
| 250 | *Ulmus pumila* | BLC | 8 | 297 | 7 | 305 | 8.6 |
| 251 | *Albizia julibrissin* | BLC | 7 | 286 | 9 | 306 | 20.1 |
| 252 | *Sapium sebiferum* | ELC | 9 | 294 | 6 | 307 | 13.1 |
| 253 | *Firmiana platanifolia* | BLF | 9 | 314 | 6 | 308 | -6.3 |
| 254 | *Firmiana platanifolia* | ELC | 9 | 315 | 6 | 308 | -6.6 |
| 255 | *Sapium sebiferum* | BLF | 9 | 296 | 6 | 308 | 11.9 |
| 256 | *Spiraea prunifolia* | ELF | 9 | 319 | 4 | 309 | -10.0 |
| 257 | *Ginkgo biloba* | BLC | 9 | 292 | 9 | 309 | 17.3 |
| 258 | *Celtis sinensis* | BLC | 7 | 300 | 6 | 311 | 10.7 |
| 259 | *Robinia pseudoacacia* | BLC | 8 | 290 | 9 | 311 | 20.5 |
| 260 | *Prunus subhirtella* | ELC | 8 | 313 | 3 | 312 | -1.0 |
| 261 | *Pistacia chinensis* | BLF | 8 | 310 | 4 | 312 | 2.4 |
| 262 | *Ulmus pumila* | BLF | 9 | 304 | 7 | 312 | 7.8 |
| 263 | *Magnolia denudata* | BLF | 9 | 301 | 9 | 312 | 11.2 |
| 264 | *Melia azedarach* | ELC | 8 | 302 | 5 | 313 | 10.6 |
| 265 | *Paulownia Sieb* | BLF | 9 | 316 | 6 | 313 | -3.1 |
| 266 | *Armeniaca mume* | ELF | 8 | 329 | 6 | 313 | -15.2 |
| 267 | *Quercus acutissima* | BLC | 9 | 302 | 6 | 315 | 12.9 |
| 268 | *Robinia pseudoacacia* | BLF | 9 | 306 | 9 | 315 | 8.4 |
| 269 | *Pistacia chinensis* | ELC | 8 | 309 | 4 | 315 | 5.5 |
| 270 | *Acer buergerianum* | BLF | 9 | 303 | 6 | 315 | 12.7 |
| 271 | *Toona sinensis* | BLC | 9 | 303 | 6 | 315 | 12.3 |
| 272 | *Lagerstroemia indica* | BLF | 9 | 303 | 9 | 316 | 13.0 |
| 273 | *Chimonanthus praecox* | BLC | 8 | 314 | 8 | 316 | 2.0 |
| 274 | *Acer buergerianum* | ELC | 8 | 307 | 6 | 316 | 9.3 |
| 275 | *Metasequoia glyptostroboides* | BLC | 9 | 310 | 9 | 316 | 5.9 |
| 276 | *Hibiscus syriacus* | BLC | 9 | 307 | 9 | 316 | 9.0 |
| 277 | *Platanus acerifolia* | BLC | 9 | 305 | 3 | 317 | 12.0 |
| 278 | *Magnolia denudata* | ELC | 9 | 305 | 9 | 317 | 12.1 |
| 279 | *Pterocarya stenoptera* | BLC | 9 | 302 | 8 | 319 | 16.7 |
| 280 | *Punica granatum* | BLC | 8 | 319 | 6 | 320 | 0.3 |
| 281 | *Albizia julibrissin* | BLF | 9 | 294 | 6 | 320 | 25.7 |
| 282 | *Amygdalus persica* | BLF | 9 | 298 | 9 | 320 | 22.3 |
| 283 | *Quercus acutissima* | BLF | 9 | 312 | 6 | 320 | 8.7 |
| 284 | *Paulownia Sieb* | ELC | 9 | 329 | 6 | 320 | -8.8 |
| 285 | *Toona sinensis* | BLF | 8 | 320 | 6 | 321 | 1.3 |
| 286 | *Ginkgo biloba* | BLF | 9 | 306 | 9 | 322 | 15.7 |
| 287 | *Amygdalus persica* | ELC | 7 | 328 | 9 | 323 | -4.4 |
| 288 | *Lagerstroemia indica* | ELC | 8 | 304 | 9 | 323 | 19.5 |
| 289 | *Celtis sinensis* | BLF | 8 | 314 | 6 | 324 | 9.4 |
| 290 | *Ulmus pumila* | ELC | 8 | 322 | 7 | 324 | 2.2 |
| 291 | *Melia azedarach* | ELF | 8 | 317 | 5 | 324 | 6.9 |
| 292 | *Pterocarya stenoptera* | BLF | 8 | 312 | 8 | 324 | 12.9 |
| 293 | *Celtis sinensis* | ELC | 8 | 322 | 6 | 326 | 3.1 |
| 294 | *Chimonanthus praecox* | BLF | 9 | 323 | 8 | 326 | 2.9 |
| 295 | *Metasequoia glyptostroboides* | BLF | 9 | 317 | 9 | 326 | 9.7 |
| 296 | *Jasminum nudiflorum* | BLC | 7 | 326 | 5 | 327 | 1.2 |
| 297 | *Ginkgo biloba* | ELC | 9 | 306 | 9 | 327 | 20.6 |
| 298 | *Sophora japonica* | BLC | 9 | 335 | 7 | 327 | -7.9 |
| 299 | *Punica granatum* | BLF | 9 | 326 | 6 | 327 | 1.3 |
| 300 | *Broussonetia papyrifera* | BLF | 9 | 295 | 9 | 328 | 33.0 |
| 301 | *Robinia pseudoacacia* | ELC | 8 | 313 | 9 | 328 | 14.4 |
| 302 | *Hibiscus syriacus* | BLF | 9 | 321 | 9 | 328 | 7.1 |
| 303 | *Quercus acutissima* | ELC | 9 | 315 | 6 | 328 | 13.3 |
| 304 | *Metasequoia glyptostroboides* | ELC | 9 | 319 | 9 | 329 | 10.0 |
| 305 | *Vitex negundo* | ELF | 8 | 313 | 4 | 330 | 16.4 |
| 306 | *Platanus acerifolia* | BLF | 9 | 312 | 3 | 330 | 18.0 |
| 307 | *Prunus subhirtella* | ELF | 8 | 336 | 3 | 330 | -6.0 |
| 308 | *Hibiscus syriacus* | ELC | 9 | 323 | 9 | 330 | 7.0 |
| 309 | *Albizia julibrissin* | ELC | 7 | 301 | 9 | 330 | 28.9 |
| 310 | *Toona sinensis* | ELC | 9 | 331 | 6 | 330 | -1.2 |
| 311 | *Sapium sebiferum* | ELF | 8 | 315 | 6 | 331 | 16.2 |
| 312 | *Lagerstroemia indica* | ELF | 8 | 320 | 6 | 331 | 11.3 |
| 313 | *Punica granatum* | ELC | 7 | 330 | 6 | 331 | 1.1 |
| 314 | *Amygdalus persica* | ELF | 9 | 333 | 6 | 332 | -0.8 |
| 315 | *Platanus acerifolia* | ELC | 9 | 318 | 3 | 334 | 16.0 |
| 316 | *Chimonanthus praecox* | ELC | 8 | 335 | 7 | 335 | -0.1 |
| 317 | *Salix babylonica* | ELC | 6 | 330 | 4 | 335 | 5.2 |
| 318 | *Pterocarya stenoptera* | ELC | 9 | 325 | 8 | 335 | 10.4 |
| 319 | *Broussonetia papyrifera* | ELC | 9 | 310 | 9 | 336 | 26.0 |
| 320 | *Firmiana platanifolia* | ELF | 8 | 335 | 6 | 336 | 0.8 |
| 321 | *Salix babylonica* | BLF | 9 | 330 | 7 | 336 | 5.9 |
| 322 | *Pistacia chinensis* | ELF | 8 | 332 | 4 | 337 | 4.9 |
| 323 | *Robinia pseudoacacia* | ELF | 8 | 334 | 6 | 337 | 3.3 |
| 324 | *Ulmus pumila* | ELF | 8 | 336 | 7 | 337 | 1.6 |
| 325 | *Magnolia denudata* | ELF | 8 | 321 | 6 | 339 | 18.2 |
| 326 | *Acer buergerianum* | ELF | 8 | 327 | 6 | 340 | 12.9 |
| 327 | *Ginkgo biloba* | ELF | 8 | 335 | 6 | 340 | 4.8 |
| 328 | *Paulownia Sieb* | ELF | 8 | 339 | 6 | 341 | 1.6 |
| 329 | *Albizia julibrissin* | ELF | 9 | 318 | 6 | 342 | 23.7 |
| 330 | *Toona sinensis* | ELF | 9 | 345 | 6 | 342 | -2.9 |
| 331 | *Sophora japonica* | BLF | 9 | 341 | 6 | 343 | 1.4 |
| 332 | *Jasminum nudiflorum* | BLF | 7 | 334 | 5 | 344 | 9.7 |
| 333 | *Chimonanthus praecox* | FF | 9 | 348 | 6 | 344 | -4.2 |
| 334 | *Broussonetia papyrifera* | ELF | 8 | 325 | 6 | 346 | 21.0 |
| 335 | *Hibiscus syriacus* | ELF | 7 | 352 | 6 | 346 | -6.4 |
| 336 | *Sophora japonica* | ELC | 6 | 345 | 7 | 347 | 1.8 |
| 337 | *Chimonanthus praecox* | ELF | 9 | 352 | 5 | 348 | -3.2 |
| 338 | *Pterocarya stenoptera* | ELF | 8 | 346 | 8 | 349 | 3.6 |
| 339 | *Chimonanthus praecox* | 50F | 9 | 359 | 6 | 355 | -3.2 |
| 340 | *Metasequoia glyptostroboides* | ELF | 8 | 346 | 6 | 356 | 10.0 |
| 341 | *Quercus acutissima* | ELF | 8 | 341 | 6 | 360 | 18.9 |
| 342 | *Sophora japonica* | ELF | 7 | 353 | 6 | 361 | 7.4 |
| 343 | *Celtis sinensis* | ELF | 8 | 349 | 6 | 362 | 13.7 |
| 344 | *Punica granatum* | ELF | 5 | 359 | 6 | 363 | 4.8 |

Unit of mean phenophase: day of the year, DOY.

APPENDIX TABLE 3: Phenological calendar of Hefei (1987-1996 and 2003-2012)

| No. | Species | Phenophase | Number of years of observation (1987-1996) | Mean phenophase (1987-1996) | Number of years of observation (2003-2012) | Mean phenophase (2003-2012) | Difference between 2003-2012 and 1987-1996 |
| --- | --- | --- | --- | --- | --- | --- | --- |
| 1 | *Ulmus pumila* | BE | 10 | 65 | 5 | 45 | -19.8 |
| 2 | *Salix babylonica* | BE | 9 | 58 | 5 | 45 | -12.5 |
| 3 | *Ginkgo biloba* | BE | 7 | 79 | 5 | 52 | -27.1 |
| 4 | *Salix babylonica* | FL | 10 | 71 | 4 | 53 | -18.6 |
| 5 | *Salix babylonica* | BB | 10 | 71 | 4 | 53 | -18.6 |
| 6 | *Ulmus pumila* | BB | 9 | 75 | 4 | 53 | -22.1 |
| 7 | *Ulmus pumila* | FF | 10 | 57 | 9 | 55 | -1.4 |
| 8 | *Platycladus orientalis* | FF | 7 | 62 | 9 | 62 | 0.0 |
| 9 | *Ulmus pumila* | 50F | 10 | 61 | 9 | 63 | 2.3 |
| 10 | *Metasequoia glyptostroboides* | BB | 7 | 82 | 5 | 65 | -17.5 |
| 11 | *Magnolia denudata* | FF | 10 | 73 | 10 | 66 | -6.9 |
| 12 | *Ulmus pumila* | EF | 10 | 66 | 9 | 70 | 3.9 |
| 13 | *Magnolia denudata* | 50F | 10 | 79 | 10 | 71 | -8.7 |
| 14 | *Salix babylonica* | FF | 10 | 81 | 10 | 73 | -8.0 |
| 15 | *Platycladus orientalis* | 50F | 7 | 66 | 9 | 73 | 7.0 |
| 16 | *Pterocarya stenoptera* | FL | 10 | 77 | 9 | 75 | -1.7 |
| 17 | *Salix babylonica* | 50L | 10 | 94 | 10 | 75 | -19.2 |
| 18 | *Robinia pseudoacacia* | BE | 7 | 83 | 5 | 75 | -8.0 |
| 19 | *Salix babylonica* | 50F | 10 | 84 | 10 | 76 | -8.5 |
| 20 | *Magnolia denudata* | EF | 10 | 88 | 10 | 77 | -11.2 |
| 21 | *Magnolia denudata* | FL | 10 | 91 | 10 | 79 | -11.8 |
| 22 | *Salix babylonica* | EF | 10 | 90 | 10 | 80 | -9.1 |
| 23 | *Robinia pseudoacacia* | BB | 10 | 91 | 3 | 84 | -7.2 |
| 24 | *Ulmus pumila* | FL | 10 | 90 | 10 | 84 | -5.8 |
| 25 | *Pterocarya stenoptera* | 50L | 10 | 99 | 10 | 84 | -15.0 |
| 26 | *Pterocarya stenoptera* | FF | 10 | 92 | 10 | 84 | -8.1 |
| 27 | *Ginkgo biloba* | FL | 7 | 98 | 10 | 84 | -13.7 |
| 28 | *Cercis chinensis* | FF | 10 | 93 | 10 | 85 | -7.9 |
| 29 | *Robinia pseudoacacia* | FL | 10 | 99 | 10 | 85 | -13.5 |
| 30 | *Wisteria sinensis* | FL | 10 | 106 | 5 | 86 | -20.6 |
| 31 | *Metasequoia glyptostroboides* | FL | 6 | 94 | 10 | 86 | -7.8 |
| 32 | *Sophora japonica* | FL | 7 | 108 | 10 | 87 | -21.9 |
| 33 | *Cercis chinensis* | FL | 10 | 90 | 10 | 88 | -2.1 |
| 34 | *Platanus acerifolia* | FL | 10 | 95 | 10 | 88 | -6.8 |
| 35 | *Magnolia denudata* | 50L | 10 | 102 | 9 | 89 | -13.3 |
| 36 | *Broussonetia papyrifera* | FL | 10 | 95 | 10 | 89 | -5.7 |
| 37 | *Bischofia polycarpa* | FL | 10 | 99 | 9 | 89 | -10.0 |
| 38 | *Hibiscus syriacus* | FL | 10 | 100 | 9 | 90 | -10.1 |
| 39 | *Cercis chinensis* | 50F | 10 | 99 | 10 | 90 | -9.0 |
| 40 | *Platanus acerifolia* | FF | 10 | 104 | 10 | 92 | -12.2 |
| 41 | *Wisteria sinensis* | FF | 10 | 104 | 9 | 93 | -11.5 |
| 42 | *Pterocarya stenoptera* | 50F | 10 | 100 | 10 | 94 | -6.0 |
| 43 | *Ulmus pumila* | 50L | 10 | 97 | 10 | 94 | -3.1 |
| 44 | *Ginkgo biloba* | 50L | 7 | 105 | 10 | 95 | -10.4 |
| 45 | *Robinia pseudoacacia* | 50L | 10 | 109 | 10 | 95 | -13.1 |
| 46 | *Platanus acerifolia* | 50F | 8 | 109 | 10 | 96 | -13.2 |
| 47 | *Cercis chinensis* | 50L | 10 | 105 | 10 | 96 | -9.0 |
| 48 | *Platanus acerifolia* | 50L | 10 | 106 | 10 | 97 | -9.5 |
| 49 | *Wisteria sinensis* | 50L | 10 | 117 | 9 | 97 | -20.1 |
| 50 | *Cercis chinensis* | EF | 10 | 108 | 10 | 97 | -10.8 |
| 51 | *Lagerstroemia indica* | FL | 10 | 108 | 9 | 98 | -10.3 |
| 52 | *Broussonetia papyrifera* | FF | 10 | 110 | 10 | 99 | -10.5 |
| 53 | *Broussonetia papyrifera* | 50L | 10 | 104 | 10 | 99 | -4.8 |
| 54 | *Bischofia polycarpa* | 50L | 10 | 110 | 9 | 99 | -10.8 |
| 55 | *Metasequoia glyptostroboides* | 50L | 7 | 102 | 9 | 100 | -2.6 |
| 56 | *Hibiscus syriacus* | 50L | 10 | 113 | 9 | 100 | -13.7 |
| 57 | *Platanus acerifolia* | EF | 8 | 115 | 10 | 100 | -14.3 |
| 58 | *Albizia julibrissin* | FL | 10 | 114 | 9 | 101 | -13.5 |
| 59 | *Bischofia polycarpa* | 50F | 10 | 116 | 9 | 101 | -15.5 |
| 60 | *Bischofia polycarpa* | FF | 10 | 111 | 9 | 101 | -10.0 |
| 61 | *Wisteria sinensis* | 50F | 10 | 114 | 9 | 101 | -12.7 |
| 62 | *Pterocarya stenoptera* | EF | 10 | 107 | 10 | 102 | -5.0 |
| 63 | *Sophora japonica* | 50L | 7 | 121 | 10 | 102 | -19.7 |
| 64 | *Ginkgo biloba* | FF | 4 | 101 | 8 | 102 | 1.4 |
| 65 | *Broussonetia papyrifera* | 50F | 10 | 113 | 10 | 103 | -10.0 |
| 66 | *Firmiana platanifolia* | FL | 10 | 109 | 9 | 103 | -5.8 |
| 67 | *Bischofia polycarpa* | EF | 9 | 122 | 9 | 105 | -17.1 |
| 68 | *Lagerstroemia indica* | 50L | 10 | 117 | 9 | 105 | -11.5 |
| 69 | *Ginkgo biloba* | EF | 4 | 110 | 5 | 106 | -4.3 |
| 70 | *Ginkgo biloba* | 50F | 4 | 106 | 7 | 107 | 0.5 |
| 71 | *Robinia pseudoacacia* | FF | 10 | 116 | 10 | 108 | -8.1 |
| 72 | *Wisteria sinensis* | EF | 10 | 122 | 5 | 109 | -12.6 |
| 73 | *Broussonetia papyrifera* | EF | 9 | 124 | 9 | 109 | -14.5 |
| 74 | *Robinia pseudoacacia* | 50F | 10 | 122 | 10 | 112 | -10.1 |
| 75 | *Firmiana platanifolia* | 50L | 10 | 120 | 9 | 114 | -6.7 |
| 76 | *Albizia julibrissin* | 50L | 9 | 129 | 9 | 114 | -15.0 |
| 77 | *Robinia pseudoacacia* | EF | 10 | 126 | 10 | 117 | -9.2 |
| 78 | *Albizia julibrissin* | FF | 10 | 152 | 9 | 140 | -12.1 |
| 79 | *Albizia julibrissin* | 50F | 10 | 166 | 9 | 150 | -16.2 |
| 80 | *Ligustrum lucidum* | FF | 10 | 164 | 8 | 153 | -10.8 |
| 81 | *Ligustrum lucidum* | 50F | 10 | 170 | 8 | 160 | -10.2 |
| 82 | *Firmiana platanifolia* | FF | 9 | 163 | 8 | 165 | 2.3 |
| 83 | *Lagerstroemia indica* | FF | 10 | 178 | 8 | 171 | -7.3 |
| 84 | *Albizia julibrissin* | EF | 9 | 209 | 9 | 171 | -38.3 |
| 85 | *Ligustrum lucidum* | EF | 10 | 179 | 8 | 171 | -7.5 |
| 86 | *Firmiana platanifolia* | 50F | 8 | 173 | 8 | 172 | -1.5 |
| 87 | *Hibiscus syriacus* | FF | 10 | 192 | 8 | 174 | -17.5 |
| 88 | *Firmiana platanifolia* | EF | 8 | 180 | 8 | 179 | -0.4 |
| 89 | *Sophora japonica* | FF | 7 | 209 | 10 | 186 | -22.8 |
| 90 | *Lagerstroemia indica* | 50F | 9 | 201 | 7 | 191 | -10.1 |
| 91 | *Sophora japonica* | 50F | 6 | 226 | 10 | 194 | -32.0 |
| 92 | *Osmanthus fragrans* | FF | 8 | 264 | 10 | 254 | -10.3 |
| 93 | *Albizia julibrissin* | BLC | 10 | 256 | 9 | 258 | 1.2 |
| 94 | *Lagerstroemia indica* | EF | 9 | 275 | 8 | 261 | -13.8 |
| 95 | *Magnolia denudata* | BLC | 10 | 271 | 9 | 265 | -5.9 |
| 96 | *Osmanthus fragrans* | 50F | 8 | 271 | 8 | 266 | -5.0 |
| 97 | *Cercis chinensis* | BLC | 10 | 261 | 10 | 266 | 4.5 |
| 98 | *Cercis chinensis* | BLF | 10 | 262 | 10 | 267 | 4.3 |
| 99 | *Magnolia denudata* | BLF | 10 | 276 | 9 | 272 | -4.8 |
| 100 | *Metasequoia glyptostroboides* | BLC | 7 | 271 | 10 | 272 | 1.5 |
| 101 | *Ulmus pumila* | BLC | 10 | 290 | 10 | 273 | -17.6 |
| 102 | *Firmiana platanifolia* | BLC | 10 | 266 | 5 | 276 | 9.9 |
| 103 | *Osmanthus fragrans* | EF | 8 | 278 | 8 | 278 | 0.6 |
| 104 | *Ulmus pumila* | BLF | 10 | 295 | 10 | 281 | -13.7 |
| 105 | *Metasequoia glyptostroboides* | BLF | 7 | 281 | 10 | 284 | 2.2 |
| 106 | *Platanus acerifolia* | BLC | 10 | 263 | 9 | 284 | 20.5 |
| 107 | *Platanus acerifolia* | BLF | 10 | 264 | 9 | 286 | 22.2 |
| 108 | *Hibiscus syriacus* | BLC | 10 | 278 | 9 | 290 | 12.6 |
| 109 | *Bischofia polycarpa* | BLC | 10 | 264 | 9 | 297 | 33.2 |
| 110 | *Ginkgo biloba* | BLF | 7 | 272 | 10 | 300 | 28.3 |
| 111 | *Hibiscus syriacus* | BLF | 9 | 281 | 9 | 303 | 21.8 |
| 112 | *Pterocarya stenoptera* | BLF | 10 | 285 | 10 | 303 | 17.5 |
| 113 | *Bischofia polycarpa* | BLF | 10 | 272 | 9 | 305 | 32.8 |
| 114 | *Magnolia denudata* | ELC | 10 | 311 | 9 | 317 | 6.3 |
| 115 | *Cercis chinensis* | ELC | 10 | 297 | 10 | 320 | 22.3 |
| 116 | *Albizia julibrissin* | ELC | 10 | 284 | 9 | 322 | 37.5 |
| 117 | *Hibiscus syriacus* | ELC | 10 | 305 | 9 | 323 | 17.4 |
| 118 | *Metasequoia glyptostroboides* | ELC | 7 | 316 | 10 | 325 | 9.2 |
| 119 | *Platanus acerifolia* | ELC | 10 | 301 | 9 | 326 | 25.0 |
| 120 | *Bischofia polycarpa* | ELC | 10 | 294 | 9 | 328 | 34.0 |
| 121 | *Cercis chinensis* | ELF | 10 | 308 | 10 | 328 | 19.8 |
| 122 | *Pterocarya stenoptera* | ELC | 10 | 299 | 9 | 329 | 29.6 |
| 123 | *Ginkgo biloba* | ELC | 7 | 326 | 10 | 330 | 4.0 |
| 124 | *Magnolia denudata* | ELF | 10 | 321 | 9 | 330 | 8.5 |
| 125 | *Robinia pseudoacacia* | ELC | 10 | 302 | 9 | 331 | 29.3 |
| 126 | *Firmiana platanifolia* | ELF | 10 | 325 | 5 | 332 | 6.3 |
| 127 | *Bischofia polycarpa* | ELF | 10 | 324 | 9 | 335 | 11.0 |
| 128 | *Salix babylonica* | ELC | 10 | 324 | 10 | 338 | 13.7 |
| 129 | *Pterocarya stenoptera* | ELF | 10 | 329 | 10 | 345 | 15.3 |
| 130 | *Hibiscus syriacus* | ELF | 10 | 324 | 9 | 345 | 20.9 |
| 131 | *Ulmus pumila* | ELC | 10 | 325 | 10 | 345 | 20.9 |
| 132 | *Robinia pseudoacacia* | ELF | 10 | 331 | 9 | 350 | 19.0 |
| 133 | *Metasequoia glyptostroboides* | ELF | 7 | 330 | 10 | 351 | 20.1 |
| 134 | *Platanus acerifolia* | ELF | 10 | 330 | 9 | 351 | 20.6 |
| 135 | *Ginkgo biloba* | ELF | 7 | 346 | 10 | 353 | 7.3 |
| 136 | *Salix babylonica* | ELF | 10 | 355 | 10 | 354 | -1.2 |

Unit of mean phenophase: day of the year, DOY.
